# Supplementary material for: Interaction of High Flash Point Electrolytes and PE-Based Separators for Li-Ion Batteries
Source: MDPI journal article supplement (doi:10.3390/ijms160920258), 2015-08-27
Supplement: s1 [file s1]

## Supplementary Information

**Table S1.** Free VFTH fitting of the viscosity data. For the fitting procedure, the following initial fitting parameters are used:  $\eta_0 = 0.2$  mPa·s;  $D = 4$ ;  $T_0 = 160$  K. No additional assumptions were done during the fitting procedure.

| Mixture | $\eta_0$ $10^{-2}$ mPa s | $T_0$ /K | $D \pm (\leq 0.1)$ | $m$  | $T_g$ /K DSC *   | $R^2$ | $\eta_{20^\circ\text{C}}/\eta_{80^\circ\text{C}}$ |
|---------|--------------------------|----------|--------------------|------|------------------|-------|---------------------------------------------------|
| M-1     | 13.4                     | 107      | 6.0                | 114  | — <sup>[a]</sup> | 0.995 | 2.3                                               |
| M-2     | 4.1                      | 171      | 4.0                | 162  | — <sup>[a]</sup> | 0.999 | 6.1                                               |
| M-3     | 13.0                     | 153      | 4.2                | 154  | 189              | 0.999 | 4.2                                               |
| M-4     | 56.6                     | 209      | 2.6                | 240  | 217              | 0.999 | 15.0                                              |
| M-5     | 2.8                      | 128      | 8.4                | 86.2 | 169              | 0.999 | 5.9                                               |
| M-6     | 3.7                      | 112      | 11.3               | 68.3 | — <sup>[a]</sup> | 0.999 | 5.9                                               |

\* DSC: heating at 10 K/min; [a] no  $T_g$  could be extracted from the measurement.

**Table S2.** Results of Walden fitting procedures.

| Sample | $c_{\text{c.s.}}^{\text{[a]}}/\text{mol}\cdot\text{dm}^{-3}(30^\circ\text{C})$ | Slope           | $R^2$ |
|--------|--------------------------------------------------------------------------------|-----------------|-------|
| M-1    | 1.016                                                                          | $0.92 \pm 0.03$ | 0.992 |
| M-2    | 1.043                                                                          | $0.83 \pm 0.02$ | 0.996 |
| M-3    | 1.061                                                                          | $0.79 \pm 0.01$ | 0.999 |
| M-4    | 1.132 <sup>[b]</sup>                                                           | $0.95 \pm 0.04$ | 0.990 |
| M-5    | 0.832                                                                          | $0.79 \pm 0.03$ | 0.989 |
| M-6    | 1.023                                                                          | $0.76 \pm 0.03$ | 0.990 |

<sup>[a]</sup> It is obvious that the differences between the concentrations of the mixtures result from differences in densities; and <sup>[b]</sup> The total concentration of ions (LiTFSA + MPPyrr-TFSA) is  $4.036 \text{ mol}\cdot\text{dm}^{-3}$  at  $30^\circ\text{C}$ .

**Table S3.** Measured values of the conductivity  $\kappa$  and viscosity  $\eta$  of mixtures M- $n$  ( $n = 1$ –6).

| Sample | $T/^\circ\text{C}$ | $\kappa^{\text{[a]}}/\text{mS cm}^{-1}$ | $\eta^{\text{[b]}}/\text{mPa s}$ |
|--------|--------------------|-----------------------------------------|----------------------------------|
| M-1    | 20                 | $10.3 \pm 0.3$                          | $4.4 \pm 0.1$                    |
| M-2    | 20                 | $6.1 \pm 0.1$                           | $11.4 \pm 0.1$                   |
| M-3    | 20                 | $5.3 \pm 0.1$                           | $13.4 \pm 0.1$                   |
| M-4    | 20                 | $0.53 \pm 0.01$                         | $399.7 \pm 0.8$                  |
| M-5    | 20                 | $2.4 \pm 0.1$                           | $19.0 \pm 0.2$                   |
| M-6    | 20                 | $2.1 \pm 0.1$                           | $37.8 \pm 0.1$                   |
| M-1    | 40                 | $14.7 \pm 0.4$                          | $3.1 \pm 0.1$                    |
| M-2    | 40                 | $9.8 \pm 0.2$                           | $5.1 \pm 0.1$                    |
| M-3    | 40                 | $8.4 \pm 0.2$                           | $7.6 \pm 0.1$                    |
| M-4    | 40                 | $1.4 \pm 0.1$                           | $111.0 \pm 1.0$                  |
| M-5    | 40                 | $4.5 \pm 0.1$                           | $9.3 \pm 0.1$                    |
| M-6    | 40                 | $3.7 \pm 0.2$                           | $19.1 \pm 0.1$                   |
| M-1    | 60                 | $19.2 \pm 0.5$                          | $2.42 \pm 0.03$                  |
| M-2    | 60                 | $14.1 \pm 0.3$                          | $2.8 \pm 0.1$                    |
| M-3    | 60                 | $11.8 \pm 0.3$                          | $4.8 \pm 0.1$                    |
| M-4    | 60                 | $3.4 \pm 0.2$                           | $48.8 \pm 0.9$                   |
| M-5    | 60                 | $6.7 \pm 0.2$                           | $5.5 \pm 0.1$                    |
| M-6    | 60                 | $5.4 \pm 0.1$                           | $11.1 \pm 0.1$                   |

**Table S3.** *Cont.*

| Sample | $T/^{\circ}\text{C}$ | $\kappa$ <sup>[a]</sup> /mS cm <sup>-1</sup> | $\eta$ <sup>[b]</sup> /mPa s |
|--------|----------------------|----------------------------------------------|------------------------------|
| M-1    | 80                   | $23.7 \pm 0.7$                               | $1.86 \pm 0.03$              |
| M-2    | 80                   | $18.6 \pm 0.5$                               | $1.87 \pm 0.05$              |
| M-3    | 80                   | $15.5 \pm 0.4$                               | $3.2 \pm 0.1$                |
| M-4    | 80                   | $6.5 \pm 0.2$                                | $26.7 \pm 0.7$               |
| M-5    | 80                   | $9.2 \pm 0.2$                                | $3.2 \pm 0.1$                |
| M-6    | 80                   | $7.5 \pm 0.2$                                | $6.4 \pm 0.1$                |

<sup>[a]</sup> Provided is the standard error (SE) from three individual measurements; and <sup>[b]</sup> Provided is the standard error of 25 data values which are taken at shear rates between 70–140 s<sup>-1</sup> from three individual measurements.

**Table S4.** Specific capacities NMC|Li cells at room temperature based on cell performance tests at cycle 1 (C = charging, DC = discharging) and cycle 4.

| Cycle <sup>[a]</sup> | Separator | M-1   | M-2    | M-3    | M-4  | M-5   | M-6   |
|----------------------|-----------|-------|--------|--------|------|-------|-------|
| C-1                  | GF/B      | 171.6 | 181.7  | 185.2  | 11.3 | 177.9 | 177.4 |
| DC-1                 | GF/B      | 149.3 | 152.0  | 137.3  | 3.9  | 139.4 | 154.4 |
| C-4                  | GF/B      | 148.5 | 150.4  | 146.2  | 5.6  | 204.6 | 153.4 |
| DC-4                 | GF/B      | 146.5 | 149.2  | 139.7  | 4.3  | 50.1  | 148.5 |
| C-1                  | COD-20    | 174.9 | 1327.8 | 1313.3 | 77.3 | 8.5   | 20.9  |
| DC-1                 | COD-20    | 152.1 | –      | –      | 20.7 | 4.1   | 11.6  |
| C-4                  | COD-20    | 149.1 | –      | –      | 17.1 | 0.9   | 129.3 |
| DC-4                 | COD-20    | 147.6 | –      | –      | 9.7  | 0.1   | 52.5  |
| C-1                  | COATED    | 172.5 | 1329.4 | 1323   | 64.7 | 15.5  | 209.6 |
| DC-1                 | COATED    | 150.2 | –      | –      | 11.6 | 8.0   | 147.7 |
| C-4                  | COATED    | 150.1 | –      | –      | 6.6  | –     | 173.2 |
| DC-4                 | COATED    | 148.7 | –      | –      | 3.9  | –     | 145.4 |

<sup>[a]</sup> C-rates: C-1: C/30; DC-1: C/25; C-4: C/10; DC-4: C/10.

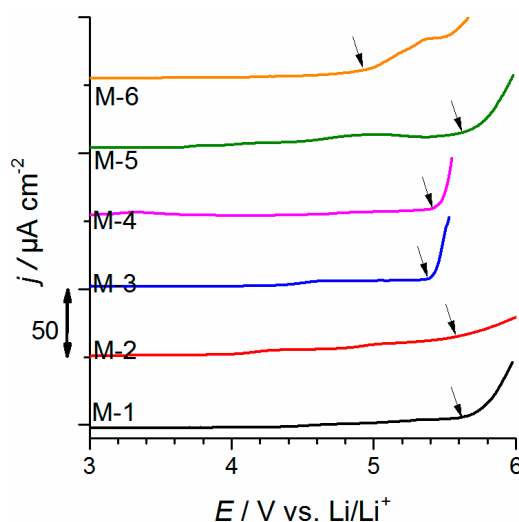**Figure S1.** Current density response of electrolyte mixtures in Pt|Li cell configuration at room temperature and  $\nu = 1 \text{ mV} \cdot \text{s}^{-1}$ . The arrows indicate the oxidative stability limit based on a tangent procedure.

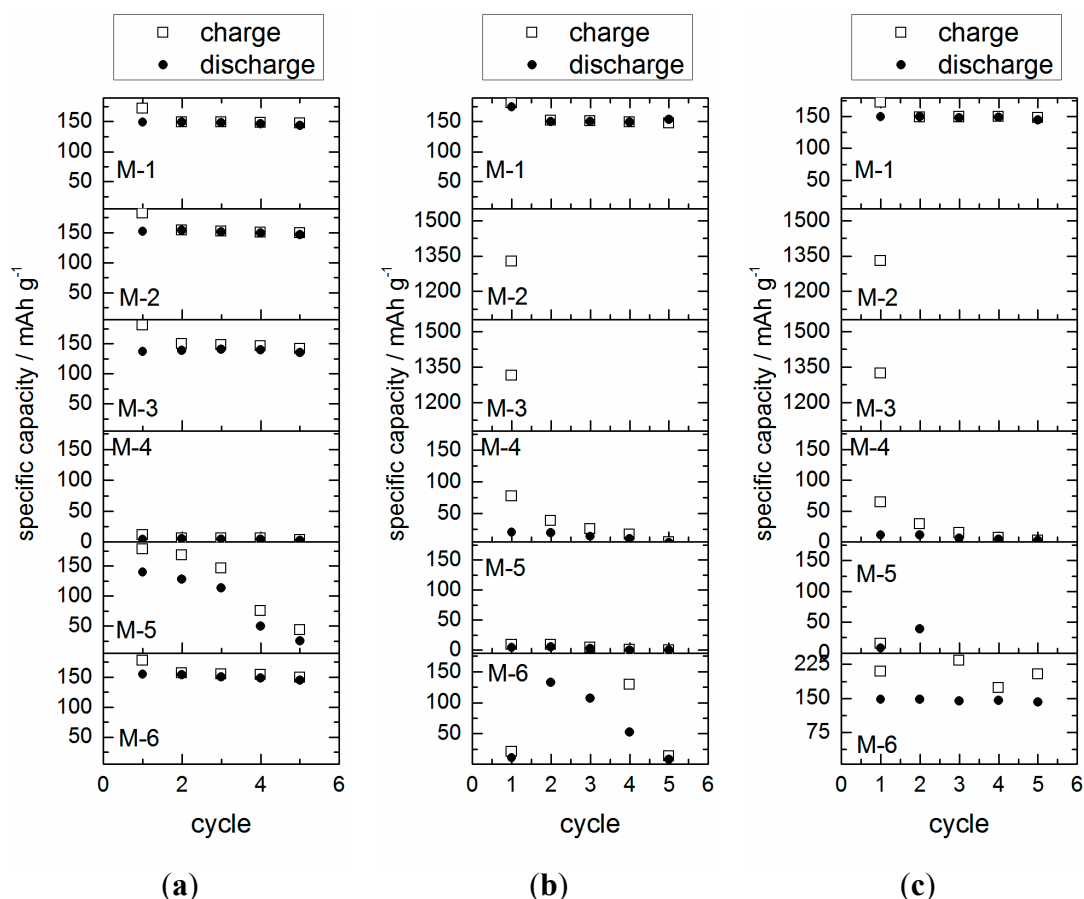

**Figure S2.** Charge and discharge capacity of electrolyte mixture investigated in the study. (a) GF/B separator; (b) COD separator; (c) COATED separator. Cell configuration: Li|NMC. square = charging, circle = discharging. C-rate (charging–discharging): cycle 1: C/30–C/25; cycle 2: C/15–C/25; cycle 3: C/10–C/15; cycle 4: C/10–C/10; cycle 5: C/5–C/5.

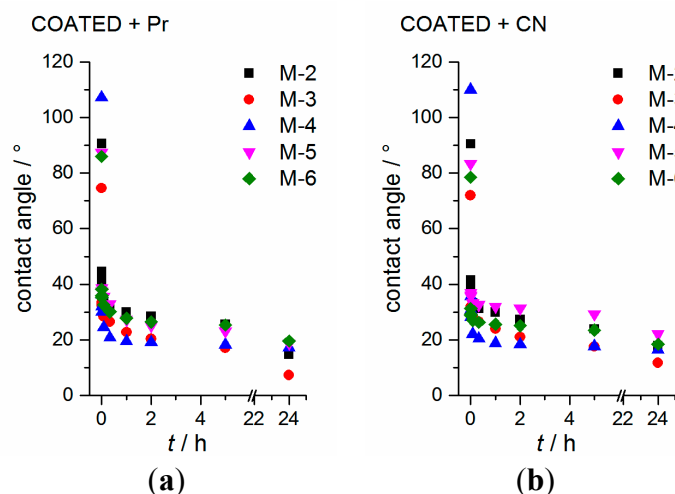

**Figure S3.** Time-dependent contact angles between silane functionalized separators and mixtures. (a) Contact angles between mixture M-*n* (*n* = 2–6) and propyl-functionalized separator COATED + Pr are shown within 24 h; and (b) Contact angles between mixture M-*n* (*n* = 2–6) and cyano-functionalized separator COATED + CN are compared within 24 h.
